# Supplementary material
Source: PubMed Central journal article supplement (PMC8436986)
Supplement: glab183_suppl_supplemental_table_1.pdf [file glab183_suppl_supplemental_table_1.pdf]

Supplemental Table 1. Studies included in analysis, and participant characteristics

| Study                                                              | Eligibility                                           |       | N    | Age, years | BMI, kg/m <sup>2</sup> | Walking speed, m/s | Mobility limitation (N, %) |
|--------------------------------------------------------------------|-------------------------------------------------------|-------|------|------------|------------------------|--------------------|----------------------------|
| Osteoporotic Fractures in Men (MrOS) Study <sup>1,2</sup>          | Ambulatory community dwelling men, age ≥ 65 yrs       | Men   | 5827 | 73.6 ± 5.8 | 27.4 ± 3.8             | 1.25 ± 0.24        | 788 (13.5)                 |
|                                                                    |                                                       | Women | 0    | N/A        | N/A                    | N/A                | N/A                        |
| Study of osteoporotic fractures (SOF) <sup>3,4</sup>               | Ambulatory community dwelling women, age ≥ 65 yrs     | Men   | 0    | N/A        | N/A                    | N/A                | N/A                        |
|                                                                    |                                                       | Women | 1243 | 77.5 ± 4.9 | 28.3 ± 5.7             | 0.88 ± 0.21        | 432 (34.8)                 |
| Health, Aging and Body Composition Study (Health ABC) <sup>5</sup> | Non-disabled black and white men and women aged 70-80 | Men   | 644  | 80.5 ± 2.9 | 26.9 ± 4.0             | 1.10 ± 0.20        | 128 (19.9)                 |
|                                                                    |                                                       | Women | 719  | 80.2 ± 2.8 | 27.3 ± 5.2             | 1.02 ± 0.20        | 234 (32.5)                 |
| MrOS Sweden <sup>6</sup>                                           | Men age ≥ 70 years in three Swedish communities       | Men   | 2847 | 75.4 ± 3.2 | 26.3 ± 3.5             | 1.27 ± 0.24        | 336 (11.8)                 |
|                                                                    |                                                       | Women | 0    | N/A        | N/A                    | N/A                | N/A                        |
| Mr&MsOS Hong Kong <sup>7,8</sup>                                   |                                                       | Men   | 2000 | 72.4 ± 5.0 | 23.4 ± 3.1             | 1.07 ± 0.23        | 141 (7.1)                  |

|                                                              |                                                                     |       |       |                |                |                 |             |
|--------------------------------------------------------------|---------------------------------------------------------------------|-------|-------|----------------|----------------|-----------------|-------------|
|                                                              | Men and women age $\geq 65$ years residing in Hong Kong             | Women | 2000  | $72.6 \pm 5.4$ | $23.9 \pm 3.4$ | $0.96 \pm 0.21$ | 292 (14.6)  |
| Concord Health and Aging in Men Project (CHAMP) <sup>9</sup> | Men age $\geq 70$ years living near Concord, Australia              | Men   | 1506  | $76.6 \pm 5.3$ | $27.8 \pm 3.9$ | $0.93 \pm 0.21$ | 130 (8.6)   |
|                                                              |                                                                     | Women | 0     | N/A            | N/A            | N/A             | N/A         |
| Cardiovascular Health Study (CHS) <sup>10,11</sup>           | Age $\geq 65$ years at original study enrollment                    | Men   | 633   | $76.8 \pm 5.0$ | $26.6 \pm 3.6$ | $0.92 \pm 0.22$ | 145 (22.9)  |
|                                                              |                                                                     | Women | 858   | $75.9 \pm 4.6$ | $27.1 \pm 5.0$ | $0.87 \pm 0.23$ | 258 (30.1)  |
| Johnston County Osteoarthritis Project <sup>12</sup>         | Rural white and black residents of Johnston County, North Carolina* | Men   | 132   | $72.2 \pm 5.9$ | $28.9 \pm 3.9$ | $1.28 \pm 0.34$ | 45 (34.1)   |
|                                                              |                                                                     | Women | 223   | $73.1 \pm 6.5$ | $29.3 \pm 6.3$ | $1.15 \pm 0.36$ | 113 (50.7)  |
| Overall                                                      |                                                                     | Men   | 13589 | $74.6 \pm 5.4$ | $26.6 \pm 3.9$ | $1.17 \pm 0.26$ | 1713 (12.6) |
|                                                              |                                                                     | Women | 5043  | $75.5 \pm 5.6$ | $26.2 \pm 5.1$ | $0.94 \pm 0.23$ | 1329 (26.4) |

\*Johnston County Osteoarthritis Project enrolled participants aged  $\geq 45$  years, but these analyses limited men and women aged  $\geq 65$  years

## Supplemental References

1. Orwoll E, Blank JB, Barrett-Connor E, et al. Design and baseline characteristics of the osteoporotic fractures in men (MrOS) study--a large observational study of the determinants of fracture in older men. *Contemporary clinical trials*. 2005;26(5):569-585.
2. Blank JB, Cawthon PM, Carrion-Petersen ML, et al. Overview of recruitment for the osteoporotic fractures in men study (MrOS). *Contemporary clinical trials*. 2005;26(5):557-568.
3. Cummings SR, Nevitt MC, Browner WS, et al. Risk factors for hip fracture in white women. Study of Osteoporotic Fractures Research Group. *The New England journal of medicine*. 1995;332(12):767-773.
4. Cauley JA, Lui LY, Ensrud KE, et al. Bone mineral density and the risk of incident nonspinal fractures in black and white women. *Jama*. 2005;293(17):2102-2108.
5. Newman AB, Haggerty CL, Goodpaster B, et al. Strength and muscle quality in a well-functioning cohort of older adults: the Health, Aging and Body Composition Study. *Journal of the American Geriatrics Society*. 2003;51(3):323-330.
6. Mellstrom D, Johnell O, Ljunggren O, et al. Free testosterone is an independent predictor of BMD and prevalent fractures in elderly men: MrOS Sweden. *Journal of bone and mineral research : the official journal of the American Society for Bone and Mineral Research*. 2006;21(4):529-535.
7. Lau EM, Leung PC, Kwok T, et al. The determinants of bone mineral density in Chinese men--results from Mr. Os (Hong Kong), the first cohort study on osteoporosis in Asian men. *Osteoporosis international : a journal established as result of cooperation between*

- the European Foundation for Osteoporosis and the National Osteoporosis Foundation of the USA*. 2006;17(2):297-303.
8. Lau EM, Suriwongpaisal P, Lee JK, et al. Risk factors for hip fracture in Asian men and women: the Asian osteoporosis study. *Journal of bone and mineral research : the official journal of the American Society for Bone and Mineral Research*. 2001;16(3):572-580.
  9. Cumming RG, Handelsman D, Seibel MJ, et al. Cohort Profile: the Concord Health and Ageing in Men Project (CHAMP). *International journal of epidemiology*. 2009;38(2):374-378.
  10. Newman AB, Arnold AM, Sachs MC, et al. Long-term function in an older cohort--the cardiovascular health study all stars study. *Journal of the American Geriatrics Society*. 2009;57(3):432-440.
  11. Tell GS, Fried LP, Hermanson B, Manolio TA, Newman AB, Borhani NO. Recruitment of adults 65 years and older as participants in the Cardiovascular Health Study. *Annals of epidemiology*. 1993;3:358-366.
  12. Jordan JM, Helmick CG, Renner JB, et al. Prevalence of knee symptoms and radiographic and symptomatic knee osteoarthritis in African Americans and Caucasians: the Johnston County Osteoarthritis Project. *The Journal of rheumatology*. 2007;34(1):172-180.
